# Supplementary material for: Kinetics and mechanism of the Barton–Kellogg olefination: a computational DFT study using CTST theory and topological approaches
Source: Royal Society of Chemistry journal article supplement (doi:10.1039/d2nj01476a), 2022-01-01
Supplement: d2nj01476a1.pdf [file d2nj01476a1.pdf]

Electronic Supporting Information (ESI)

for

Kinetics and Mechanism of the Barton-Kellogg Olefination: A Computational DFT Study  
Using CTST Theory and Topological Approaches

Ahmad Seif <sup>a,\*</sup> Temer S. Ahmadi <sup>b</sup>, Axel Klein <sup>a,\*</sup>

<sup>a</sup> University of Cologne, Faculty of Mathematics and Natural Sciences, Department of Chemistry, Institute for Inorganic Chemistry, Greinstrasse 6, 50939 Koeln, Germany.

Email: ahmaseif@yahoo.com; ORCID: 0000-0002-4172-6073 (A.S.).

Email: axel.klein@uni-koeln.de (A.K.); ORCID: 0000-0003-0093-9619; Tel.: +49-221-470-4006 (A.K.).

<sup>b</sup> Department of Chemistry, Villanova University, Villanova, PA, 19085, USA; Email: temer.ahmadi@villanova.edu; ORCID: 0000-0002-3984-4695 (T.A.).

contents:

**Table S1** Cartesian coordinates for all species at MN15-L/def2-TZVP level of theory in the solvent phase.

**Table S2** Cartesian coordinates for all species at M0-62x/def2-TZVP level of theory in the solvent phase.

**Table S1** Cartesian coordinates for all species at MN15-L/def2-TZVP level of theory in the solvent phase.

**R1**

|   |             |             |             |
|---|-------------|-------------|-------------|
| S | 1.81613900  | -1.72334700 | 0.00000000  |
| C | 0.35494600  | -1.00692200 | 0.00000000  |
| C | -0.34186200 | -0.57865900 | 1.27025500  |
| C | -0.34186200 | 0.96925400  | 1.35051500  |
| S | -1.27118100 | 1.71836400  | 0.00000000  |
| C | -0.34186200 | 0.96925400  | -1.35051500 |
| C | -0.34186200 | -0.57865900 | -1.27025500 |
| H | -1.39326100 | -0.92358500 | 1.25748000  |
| H | 0.17977200  | -1.00089400 | 2.14452500  |
| H | -0.81079300 | 1.30484000  | 2.28987400  |
| H | 0.70212500  | 1.33670300  | 1.33789800  |

|   |             |             |             |
|---|-------------|-------------|-------------|
| H | -0.81079300 | 1.30484000  | -2.28987400 |
| H | 0.70212500  | 1.33670300  | -1.33789800 |
| H | 0.17977200  | -1.00089400 | -2.14452500 |
| H | -1.39326100 | -0.92358500 | -1.25748000 |

## **R2**

|   |             |             |             |
|---|-------------|-------------|-------------|
| C | 0.33377000  | -0.97843100 | 0.00000000  |
| C | -0.22519000 | -0.48483000 | 1.31319000  |
| C | -0.22519000 | 1.05388400  | 1.35855100  |
| S | -1.18661000 | 1.76204100  | 0.00000000  |
| C | -0.22519000 | 1.05388400  | -1.35855100 |
| C | -0.22519000 | -0.48483000 | -1.31319000 |
| H | -1.27141700 | -0.83406700 | 1.43884400  |
| H | 0.36993500  | -0.89160500 | 2.15013500  |
| H | -0.68487600 | 1.42162200  | 2.29140600  |
| H | 0.81121600  | 1.43883800  | 1.30625900  |
| H | -0.68487600 | 1.42162200  | -2.29140600 |
| H | 0.81121600  | 1.43883800  | -1.30625900 |
| H | 0.36993500  | -0.89160500 | -2.15013500 |
| H | -1.27141700 | -0.83406700 | -1.43884400 |
| N | 1.28717900  | -1.85537300 | 0.00000000  |
| N | 2.13253200  | -2.63324200 | 0.00000000  |

## **TS1**

|   |             |             |             |
|---|-------------|-------------|-------------|
| C | 1.61297300  | 0.00046800  | 0.81125900  |
| S | 0.28219100  | 0.00095400  | 1.82097500  |
| N | 0.50791200  | -0.00030800 | -1.20070900 |
| N | -0.60433200 | 0.00001300  | -0.86835800 |
| C | -1.50143500 | 0.00026500  | 0.12669900  |
| C | 2.36274900  | 1.30742900  | 0.57624100  |
| C | 2.36253900  | -1.30682300 | 0.57738800  |
| C | -2.26427300 | 1.29766100  | 0.31136700  |
| C | -2.26381900 | -1.29726400 | 0.31235200  |
| H | -2.57238200 | 1.33674800  | 1.37135400  |

|   |             |             |             |
|---|-------------|-------------|-------------|
| H | -1.59048400 | 2.15156600  | 0.11577300  |
| H | -2.57177800 | -1.33571600 | 1.37240900  |
| H | -1.58970500 | -2.15105700 | 0.11734900  |
| H | 2.98614300  | -1.49736000 | 1.47498800  |
| H | 1.62306400  | -2.12853800 | 0.52257200  |
| H | 2.98614600  | 1.49889100  | 1.47378300  |
| H | 1.62335300  | 2.12915000  | 0.52039100  |
| C | 3.28448500  | 1.34049700  | -0.65141700 |
| C | 3.28408700  | -1.34119900 | -0.65035600 |
| C | -3.50654000 | -1.35998400 | -0.59487600 |
| C | -3.50691300 | 1.35925800  | -0.59602000 |
| H | 2.70710400  | -1.27804700 | -1.59007300 |
| H | 3.85079900  | -2.28718100 | -0.66831600 |
| H | 2.70755100  | 1.27683400  | -1.59113100 |
| H | 3.85152500  | 2.28627000  | -0.67009200 |
| S | 4.49533800  | -0.00052300 | -0.62433800 |
| H | -3.20008300 | -1.33395300 | -1.65856100 |
| H | -4.06575000 | -2.29528900 | -0.42458400 |
| H | -4.06637000 | 2.29458200  | -0.42663700 |
| H | -3.20035000 | 1.33232100  | -1.65965300 |
| S | -4.65171400 | -0.00036800 | -0.26738200 |

## **P1**

|   |             |             |             |
|---|-------------|-------------|-------------|
| S | -0.35088900 | 0.29117100  | 1.08475300  |
| C | 1.24308900  | 0.13511200  | 0.17667200  |
| N | 0.91802400  | 0.20082900  | -1.27224900 |
| N | -0.27878000 | 0.19530800  | -1.59394500 |
| C | -1.28107700 | 0.12355600  | -0.49251300 |
| C | -1.97826900 | -1.25367400 | -0.63211500 |
| C | -3.10537500 | -1.44089100 | 0.39459600  |
| S | -4.44303800 | -0.22847000 | 0.17599900  |
| C | -3.41572100 | 1.26433800  | 0.33055700  |
| C | -2.27536300 | 1.28870500  | -0.69856700 |
| C | 1.90834500  | -1.24347100 | 0.43323400  |

|   |             |             |             |
|---|-------------|-------------|-------------|
| C | 3.24144000  | -1.42798500 | -0.31429800 |
| S | 4.48835800  | -0.21838700 | 0.21927900  |
| C | 3.52731600  | 1.25881500  | -0.22613800 |
| C | 2.17936300  | 1.32086600  | 0.51432500  |
| H | -2.38747000 | -1.32970000 | -1.66130200 |
| H | -1.21083900 | -2.04649400 | -0.49981000 |
| H | -3.56447500 | -2.44099100 | 0.28096100  |
| H | -2.69914000 | -1.37264500 | 1.42641700  |
| H | -4.08968400 | 2.12815000  | 0.17759100  |
| H | -3.00958200 | 1.33888700  | 1.36294700  |
| H | -1.71360700 | 2.24260700  | -0.62279200 |
| H | -2.69265400 | 1.20310300  | -1.72339700 |
| H | 2.07403200  | -1.34090300 | 1.52527900  |
| H | 1.18635400  | -2.03209300 | 0.12832700  |
| H | 3.65692600  | -2.43157700 | -0.10321300 |
| H | 3.08995400  | -1.34496400 | -1.40959600 |
| H | 4.14559300  | 2.13614800  | 0.04279500  |
| H | 3.36796600  | 1.27777800  | -1.32321000 |
| H | 1.64495000  | 2.25948300  | 0.25740400  |
| H | 2.35357800  | 1.31902000  | 1.60993200  |

## **TS2**

|   |             |             |             |
|---|-------------|-------------|-------------|
| S | 0.01015300  | 0.47661100  | -0.85780800 |
| C | -1.38087200 | 0.60117900  | 0.14927500  |
| N | -0.57643500 | 2.02800600  | 1.41390400  |
| N | 0.57096600  | 2.06984000  | 1.39465900  |
| C | 1.40774300  | 0.65026200  | 0.13858300  |
| C | 1.83001000  | -0.31343200 | 1.22940900  |
| C | 2.55190100  | -1.54419400 | 0.64775500  |
| S | 4.09396500  | -1.09338400 | -0.17961900 |
| C | 3.40297300  | 0.09722800  | -1.34875600 |
| C | 2.58387500  | 1.20088300  | -0.64882400 |
| C | -2.56323800 | 1.20590500  | -0.58805100 |
| C | -3.42728000 | 0.15757400  | -1.31539000 |

|   |             |             |             |
|---|-------------|-------------|-------------|
| S | -4.12443300 | -1.05838500 | -0.17659900 |
| C | -2.56956500 | -1.59149400 | 0.57135200  |
| C | -1.78761900 | -0.41799300 | 1.19484700  |
| H | 2.52840700  | 0.23221500  | 1.89301400  |
| H | 0.97924000  | -0.63629700 | 1.84640700  |
| H | 2.82285000  | -2.25276100 | 1.44904200  |
| H | 1.88595800  | -2.07214100 | -0.06303500 |
| H | 4.25732400  | 0.53189300  | -1.89551800 |
| H | 2.76454500  | -0.43156600 | -2.08341600 |
| H | 2.23545200  | 1.92986600  | -1.40236200 |
| H | 3.23615500  | 1.73156000  | 0.07154300  |
| H | -3.18567300 | 1.71857700  | 0.17147800  |
| H | -2.21502600 | 1.96267100  | -1.31368600 |
| H | -4.27945900 | 0.63872400  | -1.82516200 |
| H | -2.82135700 | -0.36072800 | -2.08442700 |
| H | -2.83041900 | -2.33637900 | 1.34253400  |
| H | -1.94444600 | -2.09626600 | -0.19159500 |
| H | -0.92057300 | -0.81637300 | 1.74077200  |
| H | -2.43723100 | 0.09910300  | 1.92768800  |

## **P2**

|   |             |             |             |
|---|-------------|-------------|-------------|
| S | 0.00001600  | -0.00008400 | -1.50391000 |
| C | -0.75668800 | -0.00001600 | 0.17963400  |
| C | 0.75666200  | -0.00003300 | 0.17956400  |
| C | 1.53428300  | -1.27317000 | 0.54499400  |
| C | 2.89544900  | -1.34672600 | -0.16809200 |
| S | 4.01407900  | 0.00009700  | 0.31166100  |
| C | 2.89532400  | 1.34674100  | -0.16825200 |
| C | 1.53423600  | 1.27310300  | 0.54500700  |
| C | -1.53423300 | 1.27315300  | 0.54515500  |
| C | -2.89534200 | 1.34683800  | -0.16811500 |
| S | -4.01410600 | 0.00006400  | 0.31149000  |
| C | -2.89539800 | -1.34680400 | -0.16801800 |
| C | -1.53425600 | -1.27319200 | 0.54513700  |

|   |             |             |             |
|---|-------------|-------------|-------------|
| H | 1.69177800  | -1.28589700 | 1.64605600  |
| H | 0.96190300  | -2.17523400 | 0.26477300  |
| H | 3.40839100  | -2.29502400 | 0.07961000  |
| H | 2.73526500  | -1.32480500 | -1.26825100 |
| H | 3.40823600  | 2.29510300  | 0.07928000  |
| H | 2.73502700  | 1.32467000  | -1.26839600 |
| H | 0.96165300  | 2.17513600  | 0.26510100  |
| H | 1.69194100  | 1.28569200  | 1.64603600  |
| H | -1.69198900 | 1.28574800  | 1.64617900  |
| H | -0.96169300 | 2.17525700  | 0.26544300  |
| H | -3.40840800 | 2.29509100  | 0.07955300  |
| H | -2.73492100 | 1.32496700  | -1.26823200 |
| H | -3.40843800 | -2.29504300 | 0.07974900  |
| H | -2.73505500 | -1.32500300 | -1.26814200 |
| H | -0.96191500 | -2.17532200 | 0.26508500  |
| H | -1.69182200 | -1.28593300 | 1.64619100  |

## N2

|   |            |            |             |
|---|------------|------------|-------------|
| N | 0.00000000 | 0.00000000 | 0.54995200  |
| N | 0.00000000 | 0.00000000 | -0.54995200 |

## TS3

|   |             |             |             |
|---|-------------|-------------|-------------|
| S | 0.00000000  | 1.94798300  | -0.00001200 |
| C | -1.23568300 | 0.75501200  | 0.03877100  |
| C | 1.23568200  | 0.75501100  | -0.03878000 |
| C | 2.04282700  | 0.50044300  | -1.28014200 |
| C | 3.53122000  | 0.23703600  | -0.96513500 |
| S | 3.75140100  | -1.19269000 | 0.11343300  |
| C | 2.73220200  | -0.57865500 | 1.47127700  |
| C | 1.27833700  | -0.30448100 | 1.02943300  |
| C | -2.04282900 | 0.50046000  | 1.28013500  |
| C | -3.53122200 | 0.23705300  | 0.96512800  |
| S | -3.75140100 | -1.19269100 | -0.11341600 |
| C | -2.73219900 | -0.57868100 | -1.47126900 |

|   |             |             |             |
|---|-------------|-------------|-------------|
| C | -1.27833600 | -0.30449500 | -1.02942800 |
| H | 1.64825000  | -0.40614200 | -1.79860300 |
| H | 1.94882600  | 1.35042600  | -1.98100900 |
| H | 4.08949900  | 0.03260500  | -1.89404000 |
| H | 3.98060200  | 1.12648000  | -0.48442800 |
| H | 2.75068400  | -1.34724000 | 2.26245500  |
| H | 3.18932500  | 0.34353400  | 1.87806600  |
| H | 0.68974600  | 0.01940800  | 1.90674800  |
| H | 0.85488400  | -1.27598300 | 0.67248500  |
| H | -1.64825500 | -0.40612100 | 1.79860500  |
| H | -1.94882600 | 1.35045000  | 1.98099300  |
| H | -4.08950600 | 0.03264100  | 1.89403400  |
| H | -3.98059800 | 1.12648900  | 0.48440200  |
| H | -2.75067700 | -1.34728400 | -2.26243000 |
| H | -3.18932300 | 0.34349800  | -1.87808000 |
| H | -0.68974700 | 0.01938500  | -1.90674800 |
| H | -0.85487700 | -1.27599100 | -0.67246800 |

### **P3**

|   |             |             |             |
|---|-------------|-------------|-------------|
| S | -0.00092742 | 1.46617977  | 0.06941052  |
| C | -1.44830021 | 0.44432115  | -0.10189235 |
| C | 1.44666952  | 0.43429758  | 0.15140126  |
| C | 2.14610771  | 0.03447979  | -1.18465295 |
| C | 3.67700966  | -0.04293700 | -1.04384214 |
| S | 4.09323102  | -1.08666435 | 0.31366739  |
| C | 3.46031363  | -0.13231819 | 1.65294035  |
| C | 1.92646893  | -0.05655474 | 1.55215675  |
| C | -2.17314520 | -0.03491522 | 1.19413447  |
| C | -3.70123911 | -0.10099440 | 1.02096093  |
| S | -4.09191540 | -1.05898611 | -0.40522450 |
| C | -3.43372429 | -0.02644446 | -1.67235475 |
| C | -1.90144429 | 0.04085856  | -1.53887247 |
| H | 1.77021750  | -0.92362714 | -1.47488320 |
| H | 1.91859884  | 0.75775382  | -1.93879668 |

|   |             |             |             |
|---|-------------|-------------|-------------|
| H | 4.09548439  | -0.42464691 | -1.95074441 |
| H | 4.07011167  | 0.93388317  | -0.85239293 |
| H | 3.73102513  | -0.57527516 | 2.58826650  |
| H | 3.87299931  | 0.85268082  | 1.59182557  |
| H | 1.57815258  | 0.61670790  | 2.30655072  |
| H | 1.51396950  | -1.03034142 | 1.71473757  |
| H | -1.80442564 | -1.01028050 | 1.43272692  |
| H | -1.95809148 | 0.64124092  | 1.99442806  |
| H | -4.13704096 | -0.53721011 | 1.89532936  |
| H | -4.08968422 | 0.88545792  | 0.88225889  |
| H | -3.68714262 | -0.41113005 | -2.63784966 |
| H | -3.84777663 | 0.95348508  | -1.55876563 |
| H | -1.53703215 | 0.75795143  | -2.24396788 |
| H | -1.48734477 | -0.92163815 | -1.75309270 |

### **PH3**

|   |            |             |             |
|---|------------|-------------|-------------|
| P | 0.87089312 | 0.35495753  | -0.00675494 |
| H | 1.32087767 | -0.91784014 | -0.00675494 |
| H | 1.32090090 | 0.99134777  | 1.09551565  |
| H | 1.32090090 | 0.99134777  | -1.10902553 |

### **TS4**

|   |             |             |             |
|---|-------------|-------------|-------------|
| S | 0.98618100  | 1.58206900  | 1.19360700  |
| C | 0.85111800  | 0.07545300  | 0.16481300  |
| C | -0.62539400 | -0.21602700 | 0.04387200  |
| C | -1.39426400 | -0.53952200 | 1.29294500  |
| C | -2.92282200 | -0.45403700 | 1.21987800  |
| S | -3.59120100 | -1.52641800 | -0.06768200 |
| C | -2.71245000 | -0.75240400 | -1.43534000 |
| C | -1.19092800 | -0.70831700 | -1.25719900 |
| C | 1.52508500  | 0.26487700  | -1.21718500 |
| C | 3.03190600  | 0.51362100  | -1.13562100 |
| S | 3.89662600  | -0.93516900 | -0.48268100 |
| C | 2.99731400  | -1.01163800 | 1.08110900  |

|   |             |             |             |
|---|-------------|-------------|-------------|
| C | 1.48668300  | -1.16449000 | 0.89446000  |
| H | -1.14801400 | -1.61403700 | 1.45994300  |
| H | -0.98450200 | 0.03322300  | 2.13888800  |
| H | -3.35144500 | -0.79239800 | 2.17675000  |
| H | -3.26250000 | 0.58498100  | 1.05538800  |
| H | -2.95365100 | -1.32851600 | -2.34336800 |
| H | -3.09927000 | 0.27244300  | -1.58476600 |
| H | -0.73878900 | -0.17755500 | -2.10824500 |
| H | -0.78545000 | -1.74970700 | -1.29685600 |
| H | 1.37050400  | -0.63760900 | -1.84369600 |
| H | 1.03647300  | 1.12737200  | -1.71572600 |
| H | 3.44117000  | 0.69812000  | -2.14286800 |
| H | 3.24889300  | 1.39161800  | -0.50311100 |
| H | 3.38922000  | -1.88029500 | 1.63667300  |
| H | 3.20768300  | -0.10203100 | 1.67175100  |
| H | 1.02493900  | -1.26034000 | 1.89207100  |
| H | 1.27248000  | -2.08361200 | 0.30609000  |
| P | -1.56489300 | 2.41569700  | -0.40110800 |
| H | -2.70013100 | 3.02282700  | -1.05150000 |
| H | -0.60641400 | 3.36448600  | -0.82553000 |
| H | -1.83099100 | 2.92277200  | 0.89244300  |

#### **P4**

|   |             |             |             |
|---|-------------|-------------|-------------|
| S | -1.05769500 | 1.87744700  | -0.71250200 |
| C | -0.81334700 | 0.16100500  | -0.09618300 |
| C | 0.76737800  | 0.16315500  | 0.10143200  |
| C | 1.50397200  | -0.06663300 | -1.25038200 |
| C | 3.03697800  | 0.02897200  | -1.16932900 |
| S | 3.72375100  | -1.32525100 | -0.17134800 |
| C | 2.82529800  | -0.92302200 | 1.35295900  |
| C | 1.29527500  | -0.82275000 | 1.17744800  |
| C | -1.53052600 | -0.03782100 | 1.26746200  |
| C | -3.05861400 | 0.08750500  | 1.18015800  |
| S | -3.77051900 | -1.24759700 | 0.17321000  |

|   |             |             |             |
|---|-------------|-------------|-------------|
| C | -2.82391300 | -0.87213500 | -1.33046300 |
| C | -1.30102500 | -0.89983500 | -1.11089300 |
| H | 1.25925600  | -1.09482500 | -1.59043500 |
| H | 1.10339600  | 0.64595100  | -2.00259700 |
| H | 3.47031800  | -0.07408300 | -2.18205800 |
| H | 3.37986900  | 1.00773900  | -0.76790200 |
| H | 3.05122800  | -1.73451500 | 2.07131900  |
| H | 3.23692600  | 0.01174500  | 1.78164100  |
| H | 0.86274900  | -0.57075300 | 2.16852000  |
| H | 0.90048700  | -1.82620100 | 0.89673300  |
| H | -1.29160300 | -1.04816900 | 1.66573600  |
| H | -1.14914400 | 0.71245500  | 1.99759400  |
| H | -3.50818500 | 0.00327800  | 2.18766300  |
| H | -3.34182500 | 1.07210500  | 0.75507100  |
| H | -3.11133600 | -1.62875700 | -2.08523400 |
| H | -3.12450900 | 0.12436100  | -1.71795400 |
| H | -0.82259900 | -0.71373000 | -2.09237400 |
| H | -0.99601000 | -1.91204100 | -0.75567000 |
| P | 0.95596300  | 1.98765600  | 0.51718400  |
| H | 2.22254300  | 1.86804100  | 1.24134300  |
| H | 0.30118900  | 2.55575200  | 1.63596500  |
| H | 1.48035200  | 3.00259800  | -0.32811200 |

## **TS5**

|   |             |             |             |
|---|-------------|-------------|-------------|
| S | -1.15100600 | 2.17096000  | -0.45775500 |
| C | -0.68293100 | -0.25281800 | -0.01204600 |
| C | 0.75698200  | -0.09333100 | 0.03591200  |
| C | 1.47150700  | -0.34196200 | -1.30577400 |
| C | 3.00351300  | -0.22771600 | -1.31701000 |
| S | 3.79642800  | -1.26179400 | -0.06824200 |
| C | 2.95824100  | -0.46441800 | 1.31798900  |
| C | 1.44561500  | -0.69664900 | 1.27482300  |
| C | -1.40680300 | -0.37022400 | 1.31236300  |
| C | -2.93010800 | -0.22605400 | 1.29300600  |

|   |             |             |             |
|---|-------------|-------------|-------------|
| S | -3.71342600 | -1.35173500 | 0.12191600  |
| C | -2.88042700 | -0.67599000 | -1.32874000 |
| C | -1.36054800 | -0.81096600 | -1.24442000 |
| H | 1.21458900  | -1.35074500 | -1.69042500 |
| H | 1.07960200  | 0.38592200  | -2.04998200 |
| H | 3.38545000  | -0.54546500 | -2.30156000 |
| H | 3.35046100  | 0.80990800  | -1.15997000 |
| H | 3.38167400  | -0.87885500 | 2.24775500  |
| H | 3.20045800  | 0.61812600  | 1.29731700  |
| H | 1.01291600  | -0.27122300 | 2.19972600  |
| H | 1.26616100  | -1.79212200 | 1.31970900  |
| H | -1.14617900 | -1.37150600 | 1.72027000  |
| H | -0.98424800 | 0.36870100  | 2.02029800  |
| H | -3.33750200 | -0.45262900 | 2.29180600  |
| H | -3.21492300 | 0.81117200  | 1.03819500  |
| H | -3.25532900 | -1.22346100 | -2.20897700 |
| H | -3.16743100 | 0.38657400  | -1.44605500 |
| H | -0.90878700 | -0.38595100 | -2.15398500 |
| H | -1.10355300 | -1.89562600 | -1.24051200 |
| P | 0.69676700  | 2.09354000  | 0.31111600  |
| H | 1.89523400  | 2.08975700  | -0.45079100 |
| H | 0.93749900  | 1.80544800  | 1.68619600  |
| H | 0.78022500  | 3.53075600  | 0.52293400  |

## **TS6**

|   |             |             |             |
|---|-------------|-------------|-------------|
| S | 0.00007100  | 1.25773600  | -0.16978300 |
| C | -0.69417600 | -0.90765900 | 0.04144300  |
| C | 0.71512500  | -0.91389600 | 0.04316600  |
| C | 1.51626800  | -1.23163600 | -1.21117000 |
| C | 2.86740700  | -0.51315300 | -1.32806000 |
| S | 3.97883600  | -0.88590700 | 0.04282600  |
| C | 2.86526600  | -0.26734900 | 1.31970200  |
| C | 1.51526100  | -0.99749600 | 1.33475200  |
| C | -1.48847600 | -0.98157600 | 1.33829100  |

|   |             |             |             |
|---|-------------|-------------|-------------|
| C | -2.85842500 | -0.29130800 | 1.31480000  |
| S | -3.95512100 | -0.95415200 | 0.04616600  |
| C | -2.85876900 | -0.54333900 | -1.32558200 |
| C | -1.48914500 | -1.22538900 | -1.21761000 |
| H | 1.70496000  | -2.32654900 | -1.21458600 |
| H | 0.94197200  | -0.99670800 | -2.11856900 |
| H | 3.37637900  | -0.82608600 | -2.25484200 |
| H | 2.70755700  | 0.58016500  | -1.37527300 |
| H | 3.37302400  | -0.40271600 | 2.28913600  |
| H | 2.70381500  | 0.81580600  | 1.16339600  |
| H | 0.93999800  | -0.60479100 | 2.18510000  |
| H | 1.70642100  | -2.07334300 | 1.53577000  |
| H | -1.64323700 | -2.05546900 | 1.57648700  |
| H | -0.91990100 | -0.53919900 | 2.16901100  |
| H | -3.36002600 | -0.42783300 | 2.28720800  |
| H | -2.72822700 | 0.79426700  | 1.14422800  |
| H | -3.36054200 | -0.86225900 | -2.25415200 |
| H | -2.72911800 | 0.55460300  | -1.36423400 |
| H | -0.92016400 | -0.95117600 | -2.11768000 |
| H | -1.64488200 | -2.32496500 | -1.24554200 |
| P | -0.05487900 | 3.67517500  | -0.08842200 |
| H | -1.15229200 | 4.13519500  | 0.68496000  |
| H | 0.97898700  | 4.20893800  | 0.72464300  |
| H | -0.07412500 | 4.72846200  | -1.05448100 |

### **PH3S**

|   |             |             |             |
|---|-------------|-------------|-------------|
| P | 0.87089312  | 0.35495753  | -0.00675494 |
| H | 1.32087730  | -0.91784027 | -0.00675494 |
| H | 1.32090103  | 0.99134804  | 1.09551544  |
| H | 1.32090103  | 0.99134804  | -1.10902532 |
| S | -1.18910688 | 0.35498313  | -0.00675494 |

### **PMe<sub>3</sub>**

|   |             |             |             |
|---|-------------|-------------|-------------|
| P | -0.00002400 | -0.00001200 | -0.60958100 |
|---|-------------|-------------|-------------|

|   |             |             |            |
|---|-------------|-------------|------------|
| C | 1.25356700  | -1.01293100 | 0.27805000 |
| H | 1.15416100  | -2.07631300 | 0.00161900 |
| H | 2.27236100  | -0.69212700 | 0.00198800 |
| H | 1.13997700  | -0.92141900 | 1.37587900 |
| C | -1.50414200 | -0.57895800 | 0.27807500 |
| H | -2.37523800 | 0.03899200  | 0.00167000 |
| H | -1.73598100 | -1.62158800 | 0.00195400 |
| H | -1.36809700 | -0.52632700 | 1.37590400 |
| C | 0.25060100  | 1.59193800  | 0.27808000 |
| H | 1.22176700  | 2.03679500  | 0.00234300 |
| H | -0.53594200 | 2.31429000  | 0.00125800 |
| H | 0.22720000  | 1.44759100  | 1.37587300 |

**PSMe<sub>3</sub>**

|   |             |             |             |
|---|-------------|-------------|-------------|
| P | 0.16880800  | 0.00012100  | 0.00008300  |
| C | 0.91225600  | 1.50910100  | 0.67420400  |
| H | 0.57927300  | 2.37533900  | 0.08055200  |
| H | 0.57479300  | 1.64890900  | 1.71355400  |
| H | 2.01413300  | 1.45127800  | 0.65097300  |
| C | 0.91368600  | -0.17118800 | -1.64313200 |
| H | 0.57763100  | -1.11634700 | -2.09840600 |
| H | 0.58030600  | 0.66126000  | -2.28304800 |
| H | 2.01551000  | -0.16649400 | -1.58002000 |
| C | 0.91118100  | -1.33851700 | 0.97023700  |
| H | 0.57505800  | -1.25973000 | 2.01646000  |
| H | 0.57572900  | -2.30813400 | 0.56896000  |
| H | 2.01305600  | -1.28841300 | 0.93474800  |
| S | -1.77877100 | 0.00025900  | -0.00080500 |

**[TS6]<sub>PM<sub>3</sub></sub>**

|   |             |             |             |
|---|-------------|-------------|-------------|
| S | -0.10079000 | 0.58620800  | 0.16005800  |
| C | 1.66208500  | -0.82599000 | -0.03333900 |
| C | 0.42627900  | -1.52043700 | -0.04047900 |
| C | -0.09369100 | -2.25482100 | 1.19035700  |

|   |             |             |             |
|---|-------------|-------------|-------------|
| C | -1.61973600 | -2.25100800 | 1.34445400  |
| S | -2.47464800 | -3.02269400 | -0.04627100 |
| C | -1.74076400 | -2.00985600 | -1.34773600 |
| C | -0.20662700 | -2.02321200 | -1.33374700 |
| C | 2.39906500  | -0.48327500 | -1.31762600 |
| C | 3.16107600  | 0.84906500  | -1.29396900 |
| S | 4.41773600  | 0.90997800  | -0.00109100 |
| C | 3.26227300  | 0.63877700  | 1.35761100  |
| C | 2.49477800  | -0.68481000 | 1.23059600  |
| H | 0.24775200  | -3.30912400 | 1.11360200  |
| H | 0.32846800  | -1.83753500 | 2.11543200  |
| H | -1.90693300 | -2.82503000 | 2.24161800  |
| H | -1.97526800 | -1.21284600 | 1.47314800  |
| H | -2.10962100 | -2.41756200 | -2.30411400 |
| H | -2.10086000 | -0.96776600 | -1.25899600 |
| H | 0.12969700  | -1.43359400 | -2.19846300 |
| H | 0.13541800  | -3.06881700 | -1.48708000 |
| H | 3.13088800  | -1.29591300 | -1.51631900 |
| H | 1.70722200  | -0.44789900 | -2.17156400 |
| H | 3.67665400  | 1.00369000  | -2.25657000 |
| H | 2.44919200  | 1.68252600  | -1.14448700 |
| H | 3.85044700  | 0.64265500  | 2.29049800  |
| H | 2.54717100  | 1.48176900  | 1.39619900  |
| H | 1.86550700  | -0.78098700 | 2.12730000  |
| H | 3.23245100  | -1.51598000 | 1.24943500  |
| P | -1.94506000 | 2.27059200  | 0.11347100  |
| C | -2.32439700 | 3.94094100  | 0.77362000  |
| C | -2.36727400 | 2.47152800  | -1.65043800 |
| C | -3.37807000 | 1.31323600  | 0.72093100  |
| H | -1.63246600 | 3.12875400  | -2.14439800 |
| H | -2.32624600 | 1.48705400  | -2.14726900 |
| H | -3.37783100 | 2.90160400  | -1.78164700 |
| H | -1.60288700 | 4.67604400  | 0.38103300  |
| H | -3.34663500 | 4.25757300  | 0.49033900  |

|   |             |            |            |
|---|-------------|------------|------------|
| H | -2.24465800 | 3.94028700 | 1.87303300 |
| H | -4.32792100 | 1.84107200 | 0.51385700 |
| H | -3.40789600 | 0.32472700 | 0.23033500 |
| H | -3.29251500 | 1.14972900 | 1.80846500 |

### P(OEt)<sub>3</sub>

|   |             |             |             |
|---|-------------|-------------|-------------|
| P | 0.07862000  | -0.03822300 | 0.88605900  |
| O | 1.42321600  | -0.91241000 | 0.86827000  |
| O | -0.90441400 | -1.10343000 | 0.13775100  |
| O | 0.28972000  | 0.97541000  | -0.38195400 |
| C | 1.99214000  | -1.39820100 | -0.37001900 |
| H | 2.20952900  | -2.46983700 | -0.21595100 |
| H | 1.25334700  | -1.31243200 | -1.18664800 |
| C | -2.22332800 | -0.62521400 | -0.15897800 |
| H | -2.17092800 | 0.08358300  | -1.01030500 |
| C | 0.34716400  | 2.38412400  | -0.10703500 |
| H | 0.79611200  | 2.56297000  | 0.89088700  |
| H | 1.02238900  | 2.82270000  | -0.86292900 |
| H | -2.62570000 | -0.06630200 | 0.71435300  |
| C | -3.10160400 | -1.81957900 | -0.48826800 |
| H | -3.15972900 | -2.50879500 | 0.36962200  |
| H | -4.12137100 | -1.48472700 | -0.73885200 |
| H | -2.69450100 | -2.37213400 | -1.35088700 |
| C | 3.25557300  | -0.61321200 | -0.68385800 |
| H | 3.97751300  | -0.68794800 | 0.14588100  |
| H | 3.73354600  | -1.00587200 | -1.59718000 |
| H | 3.01641200  | 0.45166500  | -0.84383800 |
| C | -1.04824200 | 2.98568400  | -0.18804500 |
| H | -1.49612300 | 2.78848800  | -1.17682200 |
| H | -1.70048500 | 2.53757700  | 0.58349000  |
| H | -1.01771200 | 4.07622800  | -0.02701200 |

### PS(OEt)<sub>3</sub>

|   |            |             |            |
|---|------------|-------------|------------|
| P | 0.07043800 | -0.08151700 | 0.53167100 |
|---|------------|-------------|------------|

|   |             |             |             |
|---|-------------|-------------|-------------|
| O | 1.33241600  | -0.98355500 | 0.82598100  |
| O | -0.98457700 | -1.16966000 | 0.05045000  |
| O | 0.37038100  | 0.63422800  | -0.86461800 |
| C | 1.94466800  | -1.74409400 | -0.24422600 |
| H | 2.15573700  | -2.74016000 | 0.17948700  |
| H | 1.22888800  | -1.86656100 | -1.07718400 |
| C | -2.30864800 | -0.71475300 | -0.30119500 |
| H | -2.22204900 | 0.15059100  | -0.99010700 |
| C | 0.73960800  | 2.02644800  | -0.96387400 |
| H | 1.18928900  | 2.36279600  | -0.01243900 |
| H | 1.50595800  | 2.07437300  | -1.75776000 |
| H | -2.81421300 | -0.37127300 | 0.62000100  |
| C | -3.03655100 | -1.87743600 | -0.95261600 |
| H | -3.09086800 | -2.73330200 | -0.26172000 |
| H | -4.06235300 | -1.57697000 | -1.21829800 |
| H | -2.51764600 | -2.20033900 | -1.86894100 |
| C | 3.21702200  | -1.04359600 | -0.69632500 |
| H | 3.90606000  | -0.91068700 | 0.15231800  |
| H | 3.72585500  | -1.63882700 | -1.47199700 |
| H | 2.98211600  | -0.05139400 | -1.11579600 |
| C | -0.49276000 | 2.84600900  | -1.31474200 |
| H | -0.94826900 | 2.47280500  | -2.24717100 |
| H | -1.23326500 | 2.77211500  | -0.50122100 |
| H | -0.22616100 | 3.90610200  | -1.45435800 |
| S | -0.42259000 | 1.04812000  | 1.98709300  |

**[TS6]P(OEt)3**

|   |            |             |             |
|---|------------|-------------|-------------|
| S | 0.28923700 | 0.04678300  | -0.33343400 |
| C | 2.21542000 | 1.13630300  | -0.12315500 |
| C | 2.49207100 | -0.25132900 | -0.09318400 |
| C | 2.71942000 | -0.99841900 | 1.21332500  |
| C | 2.20353300 | -2.44315300 | 1.22564700  |
| S | 2.95354000 | -3.48114500 | -0.04485600 |
| C | 2.50446800 | -2.44101400 | -1.45030300 |

|   |             |             |             |
|---|-------------|-------------|-------------|
| C | 3.00864000  | -0.99846400 | -1.31379800 |
| C | 2.39608500  | 1.95432400  | -1.39520000 |
| C | 1.46131100  | 3.16289600  | -1.53416900 |
| S | 1.64505400  | 4.34694700  | -0.18485900 |
| C | 1.20075900  | 3.16649200  | 1.10494900  |
| C | 2.14577200  | 1.95981600  | 1.15609200  |
| H | 3.81394300  | -1.01288000 | 1.40332200  |
| H | 2.24381500  | -0.47993400 | 2.05902400  |
| H | 2.43330600  | -2.91535400 | 2.19575300  |
| H | 1.10668900  | -2.43680000 | 1.09584900  |
| H | 2.94908000  | -2.91033300 | -2.34385900 |
| H | 1.40667400  | -2.43670500 | -1.57614700 |
| H | 2.75242500  | -0.47233400 | -2.24408000 |
| H | 4.11714600  | -1.02201100 | -1.24030100 |
| H | 3.44482400  | 2.32017100  | -1.41570900 |
| H | 2.24607700  | 1.32568500  | -2.28496600 |
| H | 1.68037400  | 3.69853700  | -2.47264900 |
| H | 0.40926000  | 2.82072100  | -1.57044200 |
| H | 1.22278400  | 3.70245100  | 2.06884500  |
| H | 0.16608900  | 2.82073600  | 0.92406900  |
| H | 1.83242700  | 1.33695800  | 2.00716600  |
| H | 3.17071100  | 2.32837300  | 1.37458700  |
| P | -2.20527800 | -0.45677700 | -0.30134100 |
| O | -3.24001000 | -0.03047400 | -1.44010700 |
| O | -2.60705000 | -2.00476500 | -0.11898400 |
| O | -2.84747700 | 0.09684400  | 1.08254500  |
| C | -4.67154700 | -0.19704500 | -1.25926500 |
| H | -5.03774200 | -0.72000600 | -2.15938000 |
| H | -4.86809100 | -0.83885500 | -0.38208400 |
| C | -1.88874600 | -2.77319500 | 0.87152500  |
| H | -2.64236200 | -3.18793100 | 1.56455300  |
| C | -2.48185700 | 1.42103400  | 1.52197900  |
| H | -1.97818700 | 1.96849400  | 0.69840400  |
| H | -3.42390600 | 1.95159300  | 1.75080200  |

|   |             |             |             |
|---|-------------|-------------|-------------|
| H | -1.22289400 | -2.10709800 | 1.45865200  |
| C | -1.09820400 | -3.86528300 | 0.17138000  |
| H | -0.38497300 | -3.41744000 | -0.54160100 |
| H | -0.52762100 | -4.46418900 | 0.90164500  |
| H | -1.77202500 | -4.53666400 | -0.38548600 |
| C | -5.31316500 | 1.17032300  | -1.10222300 |
| H | -5.09619600 | 1.80672700  | -1.97539700 |
| H | -6.40724200 | 1.07039400  | -1.00600100 |
| H | -4.92985600 | 1.67545200  | -0.19943500 |
| C | -1.59014000 | 1.32663400  | 2.75009400  |
| H | -2.10608600 | 0.78194800  | 3.55831300  |
| H | -0.65651200 | 0.79269900  | 2.49972100  |
| H | -1.33468700 | 2.33553500  | 3.11752400  |

**Table S2** Cartesian coordinates for all species at M0-62x/def2-TZVP level of theory in the solvent phase.

**R1**

|   |             |             |             |
|---|-------------|-------------|-------------|
| S | -1.71116100 | 1.86559200  | 0.00000000  |
| C | -0.34680800 | 0.99543400  | 0.00000000  |
| C | 0.31406400  | 0.53168900  | 1.26707800  |
| C | 0.31406400  | -1.00005400 | 1.35622300  |
| S | 1.21557700  | -1.77980000 | 0.00000000  |
| C | 0.31406400  | -1.00005400 | -1.35622300 |
| C | 0.31406400  | 0.53168900  | -1.26707800 |
| H | 1.35066800  | 0.88161400  | 1.27331900  |
| H | -0.20561400 | 0.94721300  | 2.12930800  |
| H | 0.80357800  | -1.31881500 | 2.27601100  |
| H | -0.71230000 | -1.37246800 | 1.37404000  |
| H | 0.80357800  | -1.31881500 | -2.27601100 |
| H | -0.71230000 | -1.37246800 | -1.37404000 |
| H | -0.20561400 | 0.94721300  | -2.12930800 |
| H | 1.35066800  | 0.88161400  | -1.27331900 |

**R2**

|   |             |             |             |
|---|-------------|-------------|-------------|
| C | -0.32050800 | 0.98669800  | 0.00000000  |
| C | 0.22965000  | 0.49180900  | 1.30922900  |
| C | 0.22965000  | -1.03432000 | 1.36587800  |
| S | 1.15905000  | -1.77576400 | 0.00000000  |
| C | 0.22965000  | -1.03432000 | -1.36587800 |
| C | 0.22965000  | 0.49180900  | -1.30922900 |
| H | 1.25785300  | 0.84598700  | 1.43730100  |
| H | -0.36508900 | 0.88941300  | 2.13371600  |
| H | 0.71024700  | -1.38406300 | 2.27982700  |
| H | -0.79234800 | -1.41848700 | 1.34925500  |
| H | 0.71024700  | -1.38406300 | -2.27982700 |
| H | -0.79234800 | -1.41848700 | -1.34925500 |
| H | -0.36508900 | 0.88941300  | -2.13371600 |
| H | 1.25785300  | 0.84598700  | -1.43730100 |
| N | -1.27597700 | 1.84383500  | 0.00000000  |
| N | -2.11755100 | 2.60423100  | 0.00000000  |

## TS1

|   |             |             |             |
|---|-------------|-------------|-------------|
| C | 1.59809200  | -0.00000100 | 0.81659000  |
| S | 0.28427400  | -0.00000200 | 1.83244600  |
| N | 0.53977700  | -0.00000600 | -1.15661600 |
| N | -0.55366700 | -0.00000400 | -0.82658800 |
| C | -1.49708800 | 0.00000000  | 0.09019200  |
| C | 2.36331600  | 1.29475300  | 0.60351400  |
| C | 2.36331300  | -1.29475600 | 0.60350300  |
| C | -2.24700100 | 1.29477400  | 0.27786700  |
| C | -2.24700500 | -1.29477000 | 0.27787600  |
| H | -2.52754600 | 1.35208800  | 1.33111200  |
| H | -1.58544300 | 2.13520800  | 0.06088900  |
| H | -2.52755100 | -1.35207500 | 1.33112200  |
| H | -1.58545000 | -2.13520800 | 0.06090500  |
| H | 2.99575600  | -1.44516800 | 1.48514000  |
| H | 1.65098200  | -2.12244200 | 0.57948500  |
| H | 2.99575700  | 1.44515500  | 1.48515400  |

|   |             |             |             |
|---|-------------|-------------|-------------|
| H | 1.65098700  | 2.12244100  | 0.57950000  |
| C | 3.25568100  | 1.34962200  | -0.63194600 |
| C | 3.25567300  | -1.34961600 | -0.63196100 |
| C | -3.50138400 | -1.36411200 | -0.59270500 |
| C | -3.50138000 | 1.36411300  | -0.59271600 |
| H | 2.66876000  | -1.33013500 | -1.55020500 |
| H | 3.83550800  | -2.27274000 | -0.62684700 |
| H | 2.66877100  | 1.33015700  | -1.55019300 |
| H | 3.83552200  | 2.27274300  | -0.62681800 |
| S | 4.45709500  | 0.00000000  | -0.68282600 |
| H | -3.23240200 | -1.36648100 | -1.65134900 |
| H | -4.05523400 | -2.27934800 | -0.38366800 |
| H | -4.05522700 | 2.27935100  | -0.38368700 |
| H | -3.23239900 | 1.36647000  | -1.65136000 |
| S | -4.64492300 | 0.00000300  | -0.27012200 |

## **P1**

|   |             |             |             |
|---|-------------|-------------|-------------|
| S | -0.34691800 | 0.00001000  | -1.08118300 |
| C | 1.24621300  | 0.00000400  | -0.17364900 |
| N | 0.90065600  | 0.00001300  | 1.26001800  |
| N | -0.27468000 | 0.00001000  | 1.57229100  |
| C | -1.28482400 | 0.00000900  | 0.49187800  |
| C | -2.12588300 | 1.26875400  | 0.66611600  |
| C | -3.26076200 | 1.36262100  | -0.34191600 |
| S | -4.44179600 | -0.00001300 | -0.19016400 |
| C | -3.26074200 | -1.36263300 | -0.34191100 |
| C | -2.12586900 | -1.26874500 | 0.66612100  |
| C | 2.04218900  | 1.27880700  | -0.46810600 |
| C | 3.38294900  | 1.35165200  | 0.25282400  |
| S | 4.49244200  | -0.00000800 | -0.20508300 |
| C | 3.38294100  | -1.35166000 | 0.25282600  |
| C | 2.04217900  | -1.27880600 | -0.46810200 |
| H | -2.53248300 | 1.26715700  | 1.68034100  |
| H | -1.47110900 | 2.13717500  | 0.56245800  |

|   |             |             |             |
|---|-------------|-------------|-------------|
| H | -3.83306700 | 2.27539300  | -0.17858500 |
| H | -2.87187000 | 1.39533700  | -1.36241000 |
| H | -3.83303900 | -2.27540900 | -0.17857300 |
| H | -2.87185200 | -1.39534700 | -1.36240500 |
| H | -1.47108200 | -2.13715600 | 0.56246800  |
| H | -2.53246800 | -1.26714700 | 1.68034700  |
| H | 2.20329900  | 1.33304700  | -1.54657300 |
| H | 1.42718000  | 2.13579300  | -0.18190400 |
| H | 3.89705800  | 2.27375800  | -0.01788100 |
| H | 3.24505600  | 1.34891600  | 1.33464500  |
| H | 3.89704400  | -2.27376800 | -0.01788300 |
| H | 3.24505100  | -1.34892600 | 1.33464800  |
| H | 1.42716300  | -2.13578700 | -0.18189800 |
| H | 2.20328800  | -1.33305100 | -1.54656800 |

## **TS2**

|   |             |             |             |
|---|-------------|-------------|-------------|
| S | 0.01073100  | 0.55178100  | -0.85008300 |
| C | -1.36812500 | 0.56003900  | 0.16047400  |
| N | -0.56727700 | 1.85432000  | 1.54453500  |
| N | 0.56465200  | 1.88823100  | 1.53239100  |
| C | 1.39076400  | 0.60188100  | 0.16158100  |
| C | 1.79398700  | -0.46139300 | 1.15271200  |
| C | 2.57837100  | -1.60058300 | 0.50009500  |
| S | 4.13565600  | -1.03963900 | -0.22730500 |
| C | 3.45970700  | 0.25891300  | -1.28742900 |
| C | 2.57106900  | 1.24683800  | -0.52893200 |
| C | -2.55056000 | 1.24329300  | -0.48927800 |
| C | -3.47890800 | 0.30224500  | -1.25751600 |
| S | -4.16399400 | -1.00606000 | -0.21646400 |
| C | -2.59917700 | -1.63259600 | 0.43387800  |
| C | -1.75821200 | -0.54679900 | 1.10883900  |
| H | 2.42925600  | 0.02023300  | 1.90174600  |
| H | 0.93798500  | -0.87183900 | 1.67966900  |
| H | 2.84991600  | -2.34791700 | 1.24618300  |

|   |             |             |             |
|---|-------------|-------------|-------------|
| H | 1.97309900  | -2.09216600 | -0.26505400 |
| H | 4.31949600  | 0.77461000  | -1.71602100 |
| H | 2.90077700  | -0.19835300 | -2.10695500 |
| H | 2.23003300  | 2.02156100  | -1.21816200 |
| H | 3.16344700  | 1.73482400  | 0.25110200  |
| H | -3.11672900 | 1.71937400  | 0.31759300  |
| H | -2.20717000 | 2.03366900  | -1.15933600 |
| H | -4.33287000 | 0.85308700  | -1.65260300 |
| H | -2.95122600 | -0.14776600 | -2.10150700 |
| H | -2.86240300 | -2.40553400 | 1.15654100  |
| H | -2.03397800 | -2.10508700 | -0.37288500 |
| H | -0.88985000 | -1.01780500 | 1.55959100  |
| H | -2.34319600 | -0.09711100 | 1.91669300  |

## **P2**

|   |             |             |             |
|---|-------------|-------------|-------------|
| S | 0.00001600  | -0.00008400 | -1.50391000 |
| C | -0.75668800 | -0.00001600 | 0.17963400  |
| C | 0.75666200  | -0.00003300 | 0.17956400  |
| C | 1.53428300  | -1.27317000 | 0.54499400  |
| C | 2.89544900  | -1.34672600 | -0.16809200 |
| S | 4.01407900  | 0.00009700  | 0.31166100  |
| C | 2.89532400  | 1.34674100  | -0.16825200 |
| C | 1.53423600  | 1.27310300  | 0.54500700  |
| C | -1.53423300 | 1.27315300  | 0.54515500  |
| C | -2.89534200 | 1.34683800  | -0.16811500 |
| S | -4.01410600 | 0.00006400  | 0.31149000  |
| C | -2.89539800 | -1.34680400 | -0.16801800 |
| C | -1.53425600 | -1.27319200 | 0.54513700  |
| H | 1.69177800  | -1.28589700 | 1.64605600  |
| H | 0.96190300  | -2.17523400 | 0.26477300  |
| H | 3.40839100  | -2.29502400 | 0.07961000  |
| H | 2.73526500  | -1.32480500 | -1.26825100 |
| H | 3.40823600  | 2.29510300  | 0.07928000  |
| H | 2.73502700  | 1.32467000  | -1.26839600 |

|   |             |             |             |
|---|-------------|-------------|-------------|
| H | 0.96165300  | 2.17513600  | 0.26510100  |
| H | 1.69194100  | 1.28569200  | 1.64603600  |
| H | -1.69198900 | 1.28574800  | 1.64617900  |
| H | -0.96169300 | 2.17525700  | 0.26544300  |
| H | -3.40840800 | 2.29509100  | 0.07955300  |
| H | -2.73492100 | 1.32496700  | -1.26823200 |
| H | -3.40843800 | -2.29504300 | 0.07974900  |
| H | -2.73505500 | -1.32500300 | -1.26814200 |
| H | -0.96191500 | -2.17532200 | 0.26508500  |
| H | -1.69182200 | -1.28593300 | 1.64619100  |

## N2

|   |            |            |             |
|---|------------|------------|-------------|
| N | 0.00000000 | 0.00000000 | 0.54285800  |
| N | 0.00000000 | 0.00000000 | -0.54285800 |

## TS3

|   |             |             |             |
|---|-------------|-------------|-------------|
| S | 0.00000000  | 1.88407100  | 0.00000000  |
| C | -1.18851900 | 0.67115400  | 0.06647000  |
| C | 1.18851900  | 0.67115400  | -0.06647000 |
| C | 2.04283300  | 0.49987900  | -1.28663700 |
| C | 3.52551400  | 0.31026400  | -0.95122000 |
| S | 3.82420300  | -1.11056300 | 0.12242400  |
| C | 2.72216900  | -0.60076400 | 1.46005400  |
| C | 1.28017600  | -0.39148000 | 0.98769700  |
| C | -2.04283300 | 0.49987900  | 1.28663700  |
| C | -3.52551400 | 0.31026400  | 0.95122000  |
| S | -3.82420300 | -1.11056300 | -0.12242400 |
| C | -2.72216900 | -0.60076400 | -1.46005400 |
| C | -1.28017600 | -0.39148000 | -0.98769700 |
| H | 1.70878600  | -0.38395800 | -1.84989100 |
| H | 1.93192300  | 1.36380100  | -1.94574800 |
| H | 4.09755000  | 0.13477600  | -1.86242000 |
| H | 3.92151600  | 1.20709400  | -0.47070400 |
| H | 2.75975300  | -1.39358500 | 2.20764100  |

|   |             |             |             |
|---|-------------|-------------|-------------|
| H | 3.11230000  | 0.31286300  | 1.91358900  |
| H | 0.66633200  | -0.11889600 | 1.84794400  |
| H | 0.91420400  | -1.35996900 | 0.61133300  |
| H | -1.70878600 | -0.38395800 | 1.84989100  |
| H | -1.93192300 | 1.36380100  | 1.94574800  |
| H | -4.09755000 | 0.13477600  | 1.86242000  |
| H | -3.92151600 | 1.20709400  | 0.47070400  |
| H | -2.75975300 | -1.39358500 | -2.20764100 |
| H | -3.11230000 | 0.31286300  | -1.91358900 |
| H | -0.66633200 | -0.11889600 | -1.84794400 |
| H | -0.91420400 | -1.35996900 | -0.61133200 |

### **P3**

|   |             |             |             |
|---|-------------|-------------|-------------|
| S | -0.00002600 | 0.00001500  | 1.56251900  |
| C | -0.74840800 | 0.00000700  | -0.11072100 |
| C | 0.74841200  | 0.00000700  | -0.11069600 |
| C | 1.50228800  | 1.26501200  | -0.49417800 |
| C | 2.88861600  | 1.34742500  | 0.13028100  |
| S | 3.97899000  | -0.00001000 | -0.37701800 |
| C | 2.88860300  | -1.34743100 | 0.13028700  |
| C | 1.50227500  | -1.26500700 | -0.49417200 |
| C | -1.50225900 | -1.26500700 | -0.49422100 |
| C | -2.88860700 | -1.34743100 | 0.13019300  |
| S | -3.97897700 | -0.00001000 | -0.37714700 |
| C | -2.88862000 | 1.34742500  | 0.13018700  |
| C | -1.50227100 | 1.26501200  | -0.49422700 |
| H | 1.59402300  | 1.29283000  | -1.58507800 |
| H | 0.95322100  | 2.14962300  | -0.18138300 |
| H | 3.38274400  | 2.27081300  | -0.17115400 |
| H | 2.80790900  | 1.35242700  | 1.22022600  |
| H | 3.38272100  | -2.27082500 | -0.17114400 |
| H | 2.80789600  | -1.35242800 | 1.22023200  |
| H | 0.95319700  | -2.14961000 | -0.18137200 |
| H | 1.59401000  | -1.29283200 | -1.58507100 |

|   |             |             |             |
|---|-------------|-------------|-------------|
| H | -1.59395900 | -1.29283100 | -1.58512400 |
| H | -0.95319100 | -2.14961000 | -0.18140600 |
| H | -3.38271600 | -2.27082500 | -0.17125500 |
| H | -2.80793500 | -1.35242900 | 1.22014000  |
| H | -3.38273800 | 2.27081300  | -0.17126300 |
| H | -2.80794800 | 1.35242700  | 1.22013500  |
| H | -0.95321500 | 2.14962300  | -0.18141500 |
| H | -1.59397200 | 1.29283000  | -1.58513000 |

### **PH3**

|   |             |             |             |
|---|-------------|-------------|-------------|
| P | -0.00108400 | -0.00000200 | -0.12975000 |
| H | 0.58382100  | -1.00361300 | 0.64513600  |
| H | 0.58776400  | 1.00135900  | 0.64509300  |
| H | -1.15532300 | 0.00227800  | 0.65602100  |

### **TS4**

|   |             |             |             |
|---|-------------|-------------|-------------|
| S | 0.96667800  | 1.63146700  | 1.09707300  |
| C | 0.85314500  | 0.06351800  | 0.13274200  |
| C | -0.60653300 | -0.21314700 | 0.03556100  |
| C | -1.34891400 | -0.55434600 | 1.28525700  |
| C | -2.86797100 | -0.49692200 | 1.24314900  |
| S | -3.55985200 | -1.53297500 | -0.06181400 |
| C | -2.68896500 | -0.74658400 | -1.42945000 |
| C | -1.17947700 | -0.68786400 | -1.25751100 |
| C | 1.52003900  | 0.20560700  | -1.24609000 |
| C | 3.01422900  | 0.47602500  | -1.18155600 |
| S | 3.92102300  | -0.89891400 | -0.43429800 |
| C | 3.00113200  | -0.93423900 | 1.12001400  |
| C | 1.50405100  | -1.11112000 | 0.92814100  |
| H | -1.07110600 | -1.60574200 | 1.45849600  |
| H | -0.95026200 | 0.02937600  | 2.11267900  |
| H | -3.26486200 | -0.87999300 | 2.18247700  |
| H | -3.22636600 | 0.52705900  | 1.12964800  |
| H | -2.92203400 | -1.33013500 | -2.31963100 |

|   |             |             |             |
|---|-------------|-------------|-------------|
| H | -3.08862800 | 0.25662900  | -1.58218700 |
| H | -0.73857700 | -0.15431300 | -2.09617100 |
| H | -0.77163800 | -1.71376800 | -1.30861900 |
| H | 1.36982900  | -0.70414400 | -1.83674300 |
| H | 1.04228200  | 1.03822100  | -1.77139000 |
| H | 3.41562400  | 0.59196000  | -2.18830700 |
| H | 3.21386300  | 1.38849700  | -0.62066300 |
| H | 3.39596800  | -1.77463000 | 1.69152300  |
| H | 3.19860900  | -0.01786500 | 1.67651700  |
| H | 1.04732400  | -1.16423800 | 1.91550600  |
| H | 1.31482400  | -2.05483700 | 0.40229200  |
| P | -1.66490400 | 2.35084000  | -0.35256700 |
| H | -2.83712300 | 2.89310300  | -0.95264300 |
| H | -0.76479700 | 3.27002200  | -0.90618600 |
| H | -1.83939500 | 2.94337400  | 0.90498000  |

#### **P4**

|   |             |             |             |
|---|-------------|-------------|-------------|
| S | -1.08499000 | 1.88387900  | -0.70276300 |
| C | -0.80974500 | 0.17384800  | -0.09463900 |
| C | 0.75757100  | 0.16525200  | 0.08852400  |
| C | 1.48177900  | -0.07265200 | -1.25276200 |
| C | 3.00103100  | 0.00674300  | -1.18719000 |
| S | 3.69598300  | -1.30959300 | -0.16207200 |
| C | 2.78599500  | -0.91478900 | 1.34675700  |
| C | 1.27288900  | -0.80977300 | 1.16356500  |
| C | -1.51173500 | -0.03228700 | 1.26061400  |
| C | -3.02728400 | 0.07414900  | 1.19495400  |
| S | -3.75160400 | -1.22655500 | 0.16886100  |
| C | -2.79700000 | -0.87470100 | -1.32504500 |
| C | -1.29051300 | -0.88123600 | -1.09990100 |
| H | 1.22322100  | -1.07662100 | -1.59472000 |
| H | 1.10251800  | 0.63635500  | -1.99271200 |
| H | 3.41839500  | -0.13541100 | -2.18382600 |
| H | 3.35545600  | 0.97521700  | -0.82515900 |

|   |             |             |             |
|---|-------------|-------------|-------------|
| H | 3.00357200  | -1.72327300 | 2.04527600  |
| H | 3.19792600  | -0.00169000 | 1.77533900  |
| H | 0.84756600  | -0.55236900 | 2.13603300  |
| H | 0.88407800  | -1.79876300 | 0.89930600  |
| H | -1.26166800 | -1.02117800 | 1.65518100  |
| H | -1.14571600 | 0.71045300  | 1.97717700  |
| H | -3.45746000 | -0.04953600 | 2.18885600  |
| H | -3.32983700 | 1.04883400  | 0.81031600  |
| H | -3.07009800 | -1.64530800 | -2.04614200 |
| H | -3.11111500 | 0.08951800  | -1.72885000 |
| H | -0.82252700 | -0.69926600 | -2.06739300 |
| H | -0.98348700 | -1.87641300 | -0.75696000 |
| P | 1.01031500  | 1.95275700  | 0.52172100  |
| H | 2.25199200  | 1.82833100  | 1.22275700  |
| H | 0.32612900  | 2.51497700  | 1.59661600  |
| H | 1.48817200  | 2.91378500  | -0.37058200 |

## TS5

|   |             |             |             |
|---|-------------|-------------|-------------|
| S | -1.20754500 | 2.08363200  | -0.33152800 |
| C | -0.67665700 | -0.19780800 | -0.01016200 |
| C | 0.75835200  | -0.09859900 | 0.02341300  |
| C | 1.46065100  | -0.40110000 | -1.30056400 |
| C | 2.98131700  | -0.27058800 | -1.31820500 |
| S | 3.79811400  | -1.25057900 | -0.04175400 |
| C | 2.94951000  | -0.43858800 | 1.32856000  |
| C | 1.44132100  | -0.64083500 | 1.27931700  |
| C | -1.38494300 | -0.43191400 | 1.30688200  |
| C | -2.89765800 | -0.28190400 | 1.31921400  |
| S | -3.72629200 | -1.31065300 | 0.09048500  |
| C | -2.85586100 | -0.62871700 | -1.33549400 |
| C | -1.34824200 | -0.77709700 | -1.23603800 |
| H | 1.21840300  | -1.41557000 | -1.63850100 |
| H | 1.07720300  | 0.27772500  | -2.07274900 |
| H | 3.36445900  | -0.61894000 | -2.27737500 |

|   |             |             |             |
|---|-------------|-------------|-------------|
| H | 3.31155700  | 0.76320700  | -1.19966600 |
| H | 3.35282000  | -0.86364700 | 2.24760300  |
| H | 3.21613000  | 0.62229600  | 1.31368200  |
| H | 1.02651200  | -0.16670000 | 2.17276300  |
| H | 1.24879400  | -1.71564800 | 1.38746800  |
| H | -1.12980800 | -1.45354400 | 1.61722600  |
| H | -0.97365900 | 0.23694300  | 2.06510400  |
| H | -3.28658900 | -0.58616600 | 2.29078200  |
| H | -3.18172700 | 0.75955000  | 1.15840500  |
| H | -3.22154300 | -1.16761600 | -2.20936300 |
| H | -3.13423300 | 0.42115700  | -1.45435300 |
| H | -0.90099400 | -0.36519900 | -2.13855300 |
| H | -1.10340900 | -1.84857600 | -1.22170900 |
| P | 0.73359800  | 2.14552800  | 0.20132900  |
| H | 1.79257900  | 2.09525500  | -0.71298800 |
| H | 1.15576400  | 1.91620700  | 1.52000500  |
| H | 0.76859600  | 3.57083100  | 0.31551300  |

## **TS6**

|   |             |             |             |
|---|-------------|-------------|-------------|
| S | -0.00765500 | 1.24026200  | -0.03514300 |
| C | -0.68354900 | -0.93812600 | 0.00942900  |
| C | 0.70631800  | -0.92276900 | 0.00917500  |
| C | 1.50258400  | -1.14630100 | -1.26063500 |
| C | 2.83672500  | -0.41400400 | -1.33727400 |
| S | 3.96108100  | -0.83749200 | 0.00885200  |
| C | 2.83547100  | -0.35999300 | 1.33558000  |
| C | 1.50199500  | -1.09576300 | 1.28711800  |
| C | -1.47870300 | -1.12925300 | 1.28497800  |
| C | -2.81499800 | -0.39830900 | 1.33798700  |
| S | -3.93961900 | -0.87323500 | 0.00904800  |
| C | -2.81604200 | -0.45578400 | -1.34008000 |
| C | -1.47922700 | -1.18296300 | -1.25662100 |
| H | 1.69232700  | -2.22357400 | -1.34318600 |
| H | 0.92917000  | -0.85173200 | -2.13515300 |

|   |             |             |             |
|---|-------------|-------------|-------------|
| H | 3.34830700  | -0.67798000 | -2.26278900 |
| H | 2.67059400  | 0.66456000  | -1.33425900 |
| H | 3.34621100  | -0.58579100 | 2.27158900  |
| H | 2.66862100  | 0.71750100  | 1.28852100  |
| H | 0.92780300  | -0.76805300 | 2.14917500  |
| H | 1.69264500  | -2.16883000 | 1.41174900  |
| H | -1.66709000 | -2.20443800 | 1.39380900  |
| H | -0.90763500 | -0.81418300 | 2.15360800  |
| H | -3.32572300 | -0.63177900 | 2.27216000  |
| H | -2.65155900 | 0.67987800  | 1.29763700  |
| H | -3.32736500 | -0.72986700 | -2.26283900 |
| H | -2.65339300 | 0.62317700  | -1.34664000 |
| H | -0.90859400 | -0.90504200 | -2.13813700 |
| H | -1.66705000 | -2.26192200 | -1.31945100 |
| P | -0.05283000 | 3.65780800  | -0.02061200 |
| H | -1.24617900 | 4.27163500  | 0.39945700  |
| H | 0.82244500  | 4.34370100  | 0.84079000  |
| H | 0.16457400  | 4.44266600  | -1.16891200 |

### **PH3S**

|   |             |             |             |
|---|-------------|-------------|-------------|
| P | -0.85774400 | -0.00003700 | 0.00000100  |
| S | 1.08381900  | -0.00003300 | -0.00002700 |
| H | -1.49227900 | -0.07833200 | -1.24833200 |
| H | -1.49208000 | -1.04179600 | 0.69250500  |
| H | -1.49057200 | 1.12121100  | 0.55624200  |
